# Supplementary material for: Yeast IME2 Functions Early in Meiosis Upstream of Cell Cycle-Regulated SBF and MBF Targets
Source: PLoS One. 2012 Feb 29;7(2):e31575. doi: 10.1371/journal.pone.0031575 (PMC3290606; doi:10.1371/journal.pone.0031575)
Supplement: Table S5 — Overlap of SBF and MBF sets with known meiosis-related gene sets. Gene sets defined as SBF or MBF targets during the cell cycle were compared with gene sets defined by meiosis-related promoter elements to determine the degree of overlap. Numbers of genes in each set are shown, with “Both” indicating those genes that both respond to the cell cycle regulator and contain the indicated meiosis-related element. Statistical analysis to determine whether meiosis-related elements were differentially represented in the repressed (log2 (2 h/0 h)<0) or induced (log2 (2 h/0 h)>0) subsets of SBF or MBF target sets is shown in the bottom table (restricted to cases in which the “Both” category described above is >4). Further analysis includes comparison of subsets that are targeted by only SBF or MBF during the cell cycle with those that are targeted by both. R = A or G, W = A or T. (XLSX) [file pone.0031575.s007.xlsx]

## Sheet: SBF, MBF, and meiosis-related
Table S5. Overlap of SBF and MBF sets with known meiosis-related gene sets.
Meiosis-related promoter elementa		SBF comparison			MBF comparison
Name	Sequence	SBF only	Both	Meiosis-related only	MBF only	Both	Meiosis-related only
meiosis	TSGGCGGCTAWW	94	0	32	109	2	30
sporulation	GCGGCTA	94	0	104	109	2	102
sporulation	TAGCCGC	90	4	130	109	2	132
sporulation	CCACAG	86	8	287	104	7	288
sporulation	TTGTGTC	90	4	142	109	2	144
sporulation	GACACAA	94	0	137	109	2	135
sporulation	GATAAG	85	9	601	101	10	600
middle sporulation element	CRCAAAW	81	13	872	94	17	868
SUM1	WGTGACG	89	5	158	102	9	154
a Sets are those defined in T-profiler.
Fisher exact probability tests (repressed v. induced)
Promoter characteristic	log2 (2h/0h)		P-valueb
	< 0	> 0
SBF only	28	58
SBF & CCACAG	2	6	1
SBF only	26	59
SBF & GATAAG	4	5	0.46
SBF only	25	56
SBF & CRCAAAW	5	8	0.75
SBF only	29	60
SBF & WGTGACG	1	4	0.67
MBF only	10	94
MBF & CCACAG	0	7	1
MBF only	8	93
MBF & GATAAG	2	8	0.22
MBF only	5	89
MBF & CRCAAAW	5	12	0.0074
MBF only	9	93
MBF & WGTGACG	1	8	1
SBF only	21	37
SBF & MBF	9	27	0.36
MBF only	1	74
MBF & SBF	9	27	0.00014
b Two-tailed value calculated via the VassarStats website at http://faculty.vassar.edu/lowry/VassarStats.html.
