# Supplementary material for: Yeast IME2 Functions Early in Meiosis Upstream of Cell Cycle-Regulated SBF and MBF Targets
Source: PLoS One. 2012 Feb 29;7(2):e31575. doi: 10.1371/journal.pone.0031575 (PMC3290606; doi:10.1371/journal.pone.0031575)
Supplement: Table S6 — Consensus motif analysis of SBF targets. The repressed (log2 (2 h/0 h)<0) and induced (log2 (2 h/0 h)>0) subsets of the SBF target gene set were analyzed for consensus promoter motifs through the MUSA algorithm [48]. Motifs are shown, along with the number of genes in the set (quorum) that contain this motif. The P-value indicates the probability that the motif would occur by chance, and motifs for which P<0.001 are shown. (XLSX) [file pone.0031575.s008.xlsx]

## Sheet: MUSA
Table S6. Consensus motif analysis of SBF targets.
SBF log2 (2h/0h) < 0				SBF log2 (2h/0h) > 0
Motif	Quorum	P-value		Motif	Quorum	P-value
TTTCTTTT	24 of 30	8.90026e-12		CGCGAAA	37 of 64	6.34474e-20
CGCGAAA	19 of 30	5.60415e-10		TTTCGCG	37 of 64	6.34474e-20
TTTCGCG	19 of 30	5.60415e-10		ACGCGA	43 of 64	7.48372e-15
CTTTTCTT	15 of 30	3.60939e-07		TCGCGT	43 of 64	7.48372e-15
TTTCTTT	27 of 30	1.17843e-06		CGCGAA	47 of 64	1.02278e-14
CGCGAA	23 of 30	1.57977e-06		TTCGCG	47 of 64	1.02278e-14
TTCGCG	23 of 30	1.57977e-06		CGCGTC	32 of 64	8.34396e-12
CGAGAA	25 of 30	1.62597e-06		GACGCG	32 of 64	8.34396e-12
TTCTCG	25 of 30	1.62597e-06		AACGCG	41 of 64	5.79676e-11
TTTTCTTT	18 of 30	4.02933e-06		CGCGTT	41 of 64	5.79676e-11
CTTTTCT	20 of 30	2.30759e-05		CGCGA	59 of 64	7.51752e-10
ATACGG	17 of 30	7.54187e-05		TCGCG	59 of 64	7.51752e-10
CCGTAT	17 of 30	7.54187e-05		AAAAGAAA	34 of 64	8.50006e-09
ACGCGA	18 of 30	7.79485e-05		TTTCTTTT	34 of 64	8.50006e-09
TCGCGT	18 of 30	7.79485e-05		AAACGC	50 of 64	2.12091e-08
TTCTTTTC	12 of 30	0.000101121		GCGTTT	50 of 64	2.12091e-08
GTGGTA	17 of 30	0.000104923		GTGGTA	36 of 64	1.10013e-07
TACCAC	17 of 30	0.000104923		TACCAC	36 of 64	1.10013e-07
CTTGGC	20 of 30	0.000119211		CACGAAA	26 of 64	7.96182e-07
GCCAAG	20 of 30	0.000119211		TTTCGTG	26 of 64	7.96182e-07
CTATAT	21 of 30	0.000221622		ATACATA	25 of 64	9.67886e-07
GTATAT	20 of 30	0.000241631		TATGTAT	25 of 64	9.67886e-07
CGCGTC	14 of 30	0.000255573		ACGCG	53 of 64	2.1508e-06
GACGCG	14 of 30	0.000255573		CGCGT	53 of 64	2.1508e-06
CACGAAA	13 of 30	0.00027073		TCTATAT	24 of 64	3.74033e-06
TTTCGTG	13 of 30	0.00027073		CTATAT	43 of 64	6.46275e-06
CAATAG	22 of 30	0.000357268		AAGAAG	54 of 64	7.98346e-06
CTATTG	22 of 30	0.000357268		AAAAGAA	47 of 64	1.25805e-05
AGAAAAGA	10 of 30	0.000419945		AAAGAAA	47 of 64	1.25805e-05
TCTTTTCT	10 of 30	0.000419945		TTTTCTT	47 of 64	1.25805e-05
CATTCT	24 of 30	0.00061409		AAAGGAAA	20 of 64	1.4697e-05
AGAAAGA	16 of 30	0.000704815		TGGTGG	29 of 64	5.07938e-05
AACGCG	18 of 30	0.000740691		AAGAAA	63 of 64	5.13336e-05
CGCGTT	18 of 30	0.000740691		ACCACC	27 of 64	5.24102e-05
AGCCAC	16 of 30	0.000815766		TCTTTTC	33 of 64	5.71325e-05
GTGGCT	16 of 30	0.000815766		GCGAAA	45 of 64	8.35373e-05
CGTGGA	15 of 30	0.000843966		TTTCGC	45 of 64	8.35373e-05
TCCACG	15 of 30	0.000843966		ATACAT	45 of 64	0.000132844
CACAGC	16 of 30	0.000899587		AAATAAAA	28 of 64	0.000226619
GCTGTG	16 of 30	0.000899587		TTTTATTT	28 of 64	0.000226619
ACGTGG	14 of 30	0.000978787		ATACCA	37 of 64	0.000276858
CCACGT	14 of 30	0.000978787		TGGTAT	37 of 64	0.000276858
				CGCCAA	32 of 64	0.000283964
				TTGGCG	32 of 64	0.000283964
				GCTTCT	40 of 64	0.000307066
				CGAAAA	54 of 64	0.000490398
				TTTTCG	54 of 64	0.000490398
				CAGAAG	38 of 64	0.000504762
				CTTCTG	38 of 64	0.000504762
				AAACAAAA	25 of 64	0.000508707
				GACGC	49 of 64	0.000528178
				GCGTC	49 of 64	0.000528178
				ATCTCTT	23 of 64	0.000596839
				TACCA	61 of 64	0.00068744
				TGGTA	61 of 64	0.00068744
				GAAGGC	30 of 64	0.000941189
				GCCTTC	30 of 64	0.000941189
				TATTAT	52 of 64	0.000991977
